# Supplementary material for: Chemical Vapor Transport Synthesis of Fibrous Red Phosphorus Crystal as Anodes for Lithium-Ion Batteries
Source: MDPI journal article supplement (doi:10.3390/nano13061060), 2023-03-15
Supplement: s1 [file s1]

# Chemical Vapor Transport Synthesis of Fibrous Red Phosphorus Crystal as Anode for Lithium Ion Battery

Lei Liu<sup>1,†</sup>, Xing Gao<sup>2,†</sup>, Xuemei Cui<sup>3</sup>, Bofeng Wang<sup>1</sup>, Fangzheng Hu<sup>1</sup>, Tianheng Yuan<sup>1</sup>, Jianhua Li<sup>4</sup>, Lei Zu<sup>1,\*</sup>, Huiqin Lian<sup>1</sup> and Xiuguo Cui<sup>1,\*</sup>

<sup>1</sup> College of New Materials and Chemical Engineering, Beijing Institute of Petrochemical Technology, Beijing 102617, China

<sup>2</sup> School of Materials Science and Engineering, Beijing University of Chemical Technology, Beijing 10002, China

<sup>3</sup> Department of Mechanical and Materials Engineering, College of Engineering and Applied Science, University of Cincinnati, 2600 Clifton Ave, Cincinnati, OH, 45221.

<sup>4</sup> Kailuan (Group) Limited Liability Corporation, Tangshan 064012, China

\* Correspondence: [zulei@bipt.edu.cn](mailto:zulei@bipt.edu.cn) (Z.L.); [cuixiuguo@bipt.edu.cn](mailto:cuixiuguo@bipt.edu.cn) (C.X.)

† Lei Liu and Xing Gao authors contributed equally to this work.

**Table S1.** Comparison of the electrochemical performance of our work with that of previous phosphorus-based lithium-ion batteries.

| Modified strategy                                  | Current density | Cycle number | Residual capacity | Ref.      |
|----------------------------------------------------|-----------------|--------------|-------------------|-----------|
| BP-G                                               | 0.2C            | 100          | 855mAh/g          | 5         |
| PANI-(BP-C)                                        | 520mA/g         | 100          | 1250mAh/g         | 6         |
| RP-porous carbon                                   | 260 mA/g        | 120          | 1187.7mAh/g       | 12        |
| RP-sulfur/carbon                                   | 200 mA/g        | 200          | 935.3mAh/g        | 17        |
| RP/CMK-3                                           | 0.25C           | 85           | 971mAh/g          | 32        |
| BP/C/CNTs                                          | 150 mA/g        | 100          | 1036mAh/g         | 33        |
| BP@NCNTs                                           | 100 mA/g        | 100          | 750mAh/g          | 34        |
| RP/hierarchical micromesoporous carbon nanospheres | 500 mA/g        | 100          | 1090mAh/g         | 35        |
| RP/porous C                                        | 100 mA/g        | 55           | 696mAh/g          | 36        |
| RP-rGO                                             | 100 mA/g        | 50           | 693mAh/g          | 37        |
| RP/TiN/CNT                                         | 200 mA/g        | 45           | 900mAh/g          | 38        |
| RP/CNT                                             | 0.5C            | 50           | 998.5mAh/g        | 39        |
| P inside MWCNTs                                    | 100 mA/g        | 100          | 1012mAh/g         | 40        |
| BP/RGO sandwiches film                             | 100 mA/g        | 200          | 607mAh/g          | 41        |
| Phosphorus@ZIF-8 Derived Porous Carbon             | 100 mA/g        | 100          | 786mAh/g          | 42        |
| FP-C                                               | 200 mA/g        | 80           | 1621mAh/g         | This work |
| FP-C                                               | 2A/g            | 200          | 1081.58mAh/g      | This work |

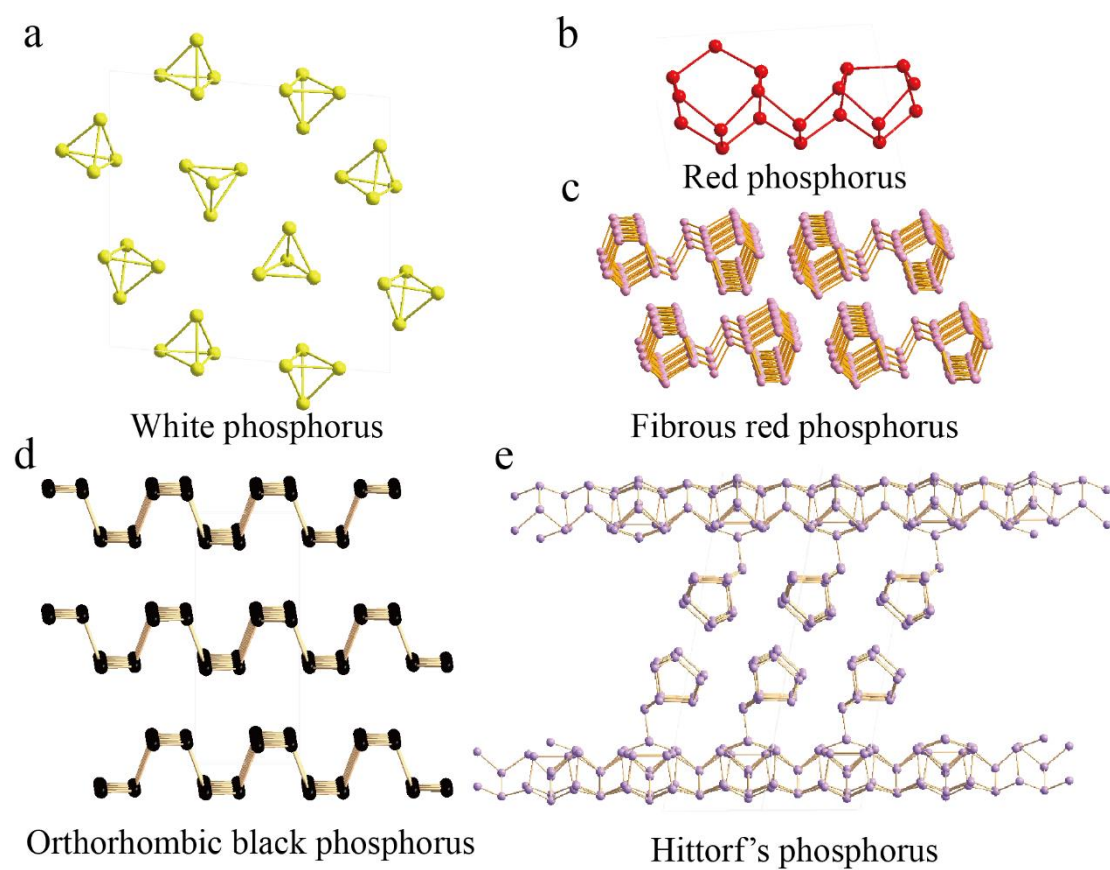

**Figure S1.** Schematic structural of different allotropes of phosphorus.

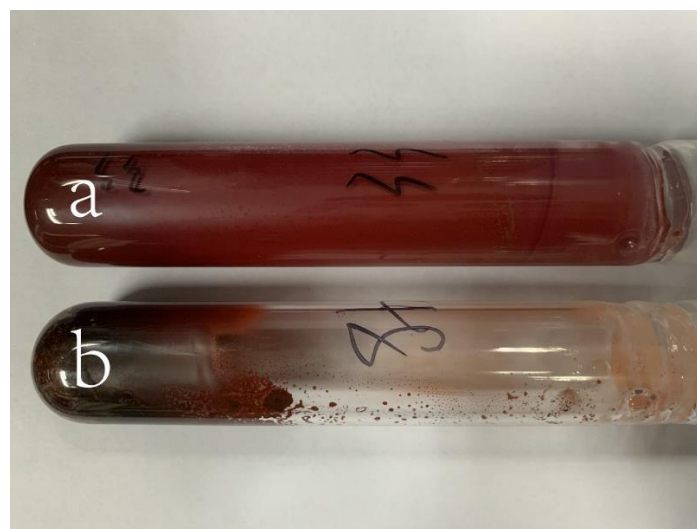

**Figure S2.** Optical photographs of the quartz tube reactor after the reaction. (a) without  $I_2$ , (b) with  $I_2$ .

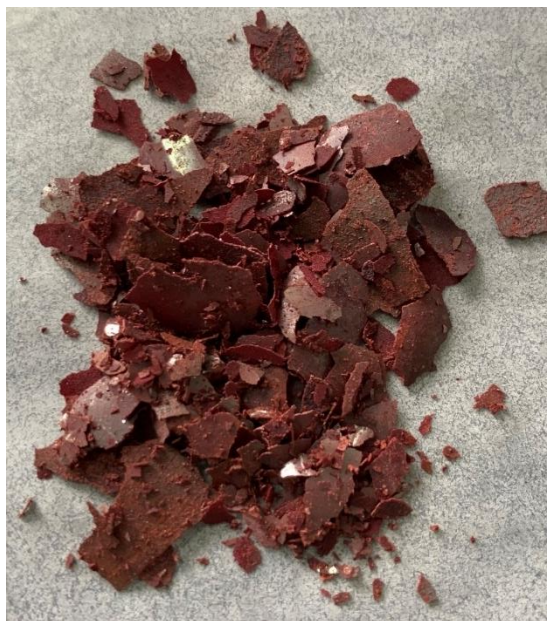

**Figure S3.** Optical photographs of FP bulk lumps.

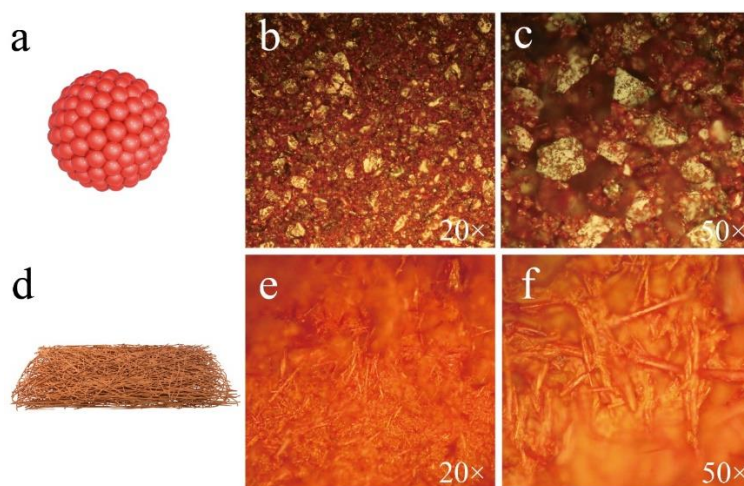

**Figure S4.** Optical photographs of Filamentous red phosphorus.

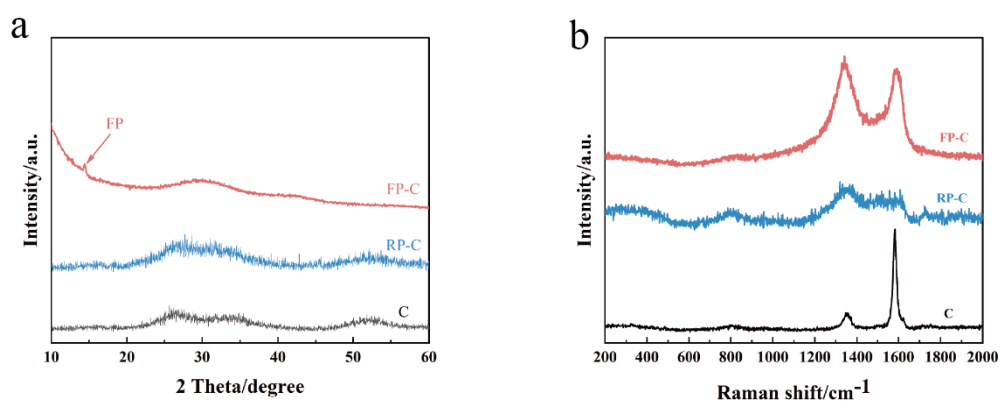

**Figure S5.** FP-C and RP-C composites (a) XRD diagram (b) Raman spectra.

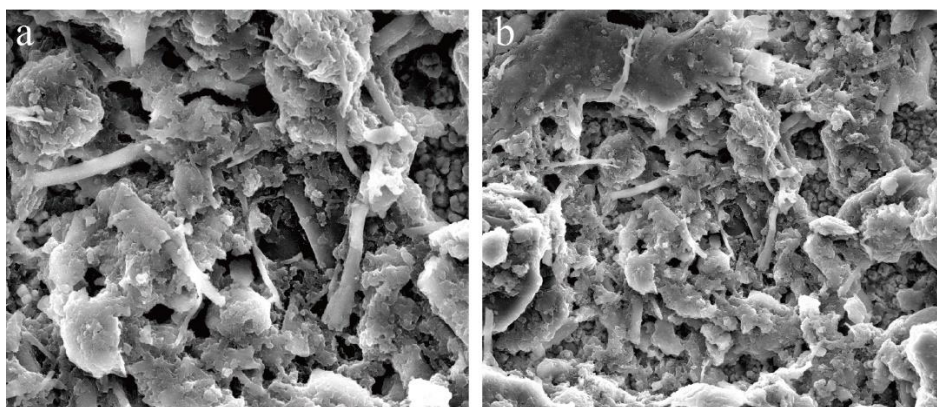

**Figure S6.** SEM images of FP-C electrodes in LIBs after 20 cycles at current density of 0.5A/g.

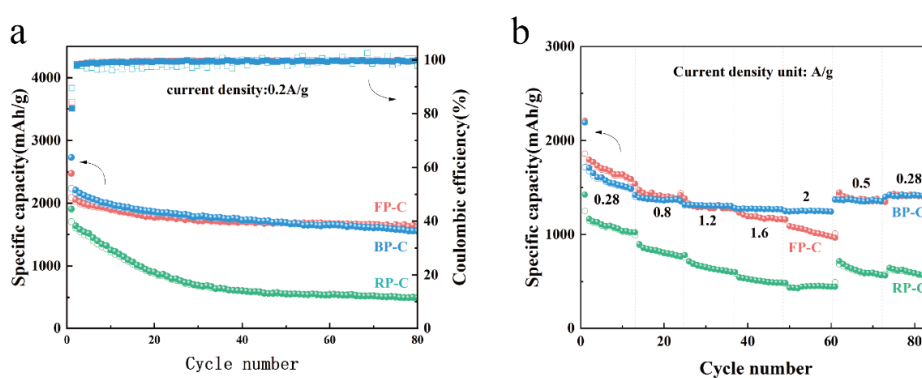

**Figure S7.** (a)Cycling stability of BP-C anodes for 80 cycles at 0.2A/g.(b) Rate performance of FP-C and RP-C anodes at the varied rate from 0.28A/g to 2A/g.
